# Supplementary material
Source: Springer Nature journal article supplement (https://www.springermedizin.de/resource/supplementary/12879_2012_2144_MOESM1_ESM.pdf/9443554)

**M 1 2 3 4 5 6 7 8 9 10 11 M**

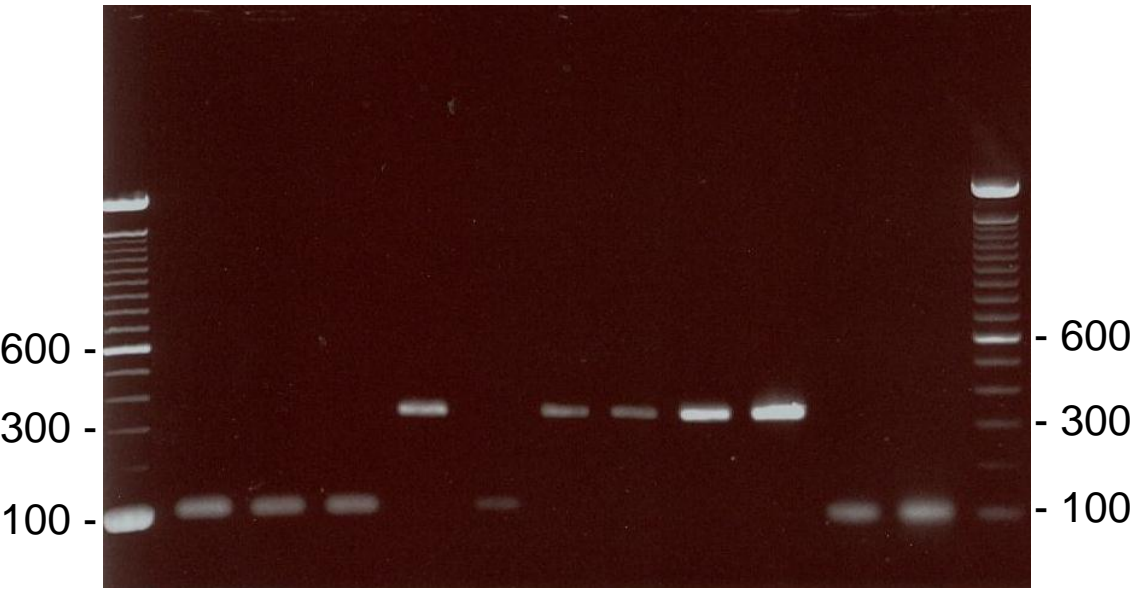

Supplement: MOESM1 [file 9443554]
